# Supplementary material
Source: PubMed Central journal article supplement (PMC1569168)

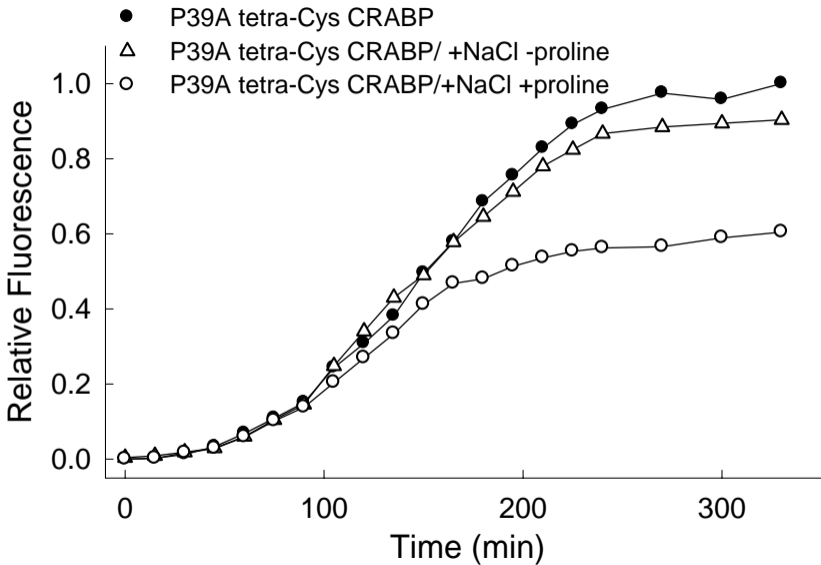

Supplement: pnas_0603772103_1.pdf [file pnas_0603772103_1.pdf]

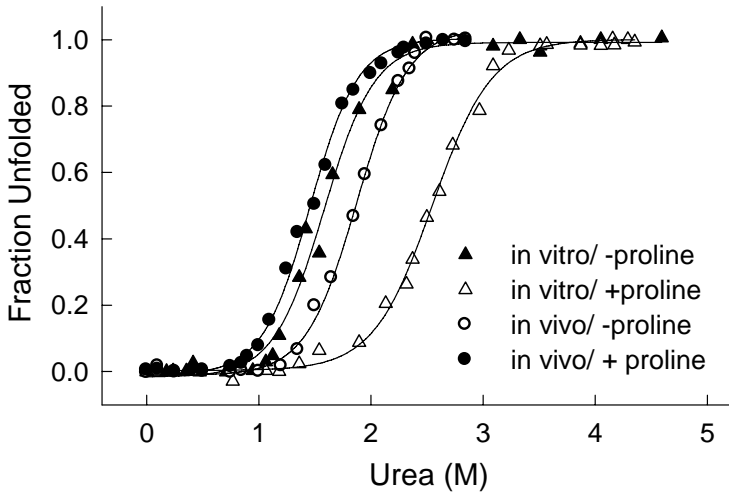

Supplement: pnas_0603772103_2.pdf [file pnas_0603772103_2.pdf]
